# Supplementary material for: Estimating the basic reproduction number at the beginning of an outbreak
Source: PubMed Central journal article supplement (PMC9205483; doi:10.1371/journal.pone.0269306), 2022-06-17
Supplement: pone.0269306.s002.pdf [file pone.0269306.s002.pdf]

# Appendix

## Disease models

We employ SIR, SEIR and SEAIR model structures, where  $S$ ,  $E$ ,  $A$ ,  $I$  and  $R$  denotes susceptible, exposed (infected, no symptoms, not infectious), asymptomatic infected (infected, no symptoms, infectious), symptomatic infected (infected, symptomatic, infectious), and recovered individuals, respectively. A flow diagram of each model is shown in Figure 7. The ODEs governing our models are given below.

### SIR model

$$\begin{aligned}\frac{dS(t)}{dt} &= -\beta S(t) \frac{I(t)}{N} \\ \frac{dI(t)}{dt} &= \beta S(t) \frac{I(t)}{N} - \gamma I(t) \\ \frac{dR(t)}{dt} &= \gamma I(t) \\ N &= S(t) + I(t) + R(t)\end{aligned}$$

### SEIR model

$$\begin{aligned}\frac{dS(t)}{dt} &= -\beta S(t) \frac{I(t)}{N} \\ \frac{dE(t)}{dt} &= \beta S(t) \frac{I(t)}{N} - \alpha E(t) \\ \frac{dI(t)}{dt} &= \alpha E(t) - \gamma I(t) \\ \frac{dR(t)}{dt} &= \gamma I(t) \\ N &= S(t) + E(t) + I(t) + R(t)\end{aligned}$$

**SEAIR model**

$$\begin{aligned} \frac{dS(t)}{dt} &= -\beta S(t) \frac{I(t) + A(t)}{N} \\ \frac{dE(t)}{dt} &= \beta S(t) \frac{I(t) + A(t)}{N} - \alpha E(t) \\ \frac{dA(t)}{dt} &= \alpha E(t) - \rho A(t) \\ \frac{dI(t)}{dt} &= \rho A(t) - \gamma I(t) \\ \frac{dR(t)}{dt} &= \gamma I(t) \\ N &= S(t) + E(t) + A(t) + I(t) + R(t) \end{aligned}$$

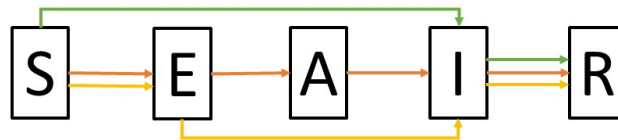

**Fig 7.** Flow diagrams of the SIR (green arrows), SEIR (yellow arrows), and SEAIR (orange arrows) models.

## Least squares estimation for the IDEA method

From (2), our objective function is

$$Q = \sum_{j=1}^k \left( \log R_0 - \frac{1}{s_j} \log \tilde{I}(s_j) - s_j \log(1+d) \right)^2.$$

Let  $\eta = \log R_0$  and  $\xi = \log(1+d)$  and note that both of these transformations are monotone increasing. Next, we take partial derivatives of  $Q = Q(\eta, \xi)$  with respect to  $\eta$  and  $\xi$ .

$$\begin{aligned} \frac{\partial Q}{\partial \eta} &= 2 \sum_{j=1}^k \left( \eta - \frac{1}{s_j} \log \tilde{I}(s_j) - s_j \xi \right) \\ \frac{\partial Q}{\partial \xi} &= 2 \sum_{j=1}^k s_j \left( \eta - \frac{1}{s_j} \log \tilde{I}(s_j) - s_j \xi \right) \end{aligned}$$

Finally, we minimize  $Q$  by setting  $\frac{\partial Q}{\partial \eta} = 0$  and  $\frac{\partial Q}{\partial \xi} = 0$ . Solving these equations, we obtain

$$\begin{aligned} \xi &= \frac{k\eta - \sum_{j=1}^k \frac{1}{s_j} \log \tilde{I}(s_j)}{\sum_{j=1}^k s_j}, \\ \xi &= \frac{\eta \sum_{j=1}^k s_j - \sum_{j=1}^k \log \tilde{I}(s_j)}{\sum_{j=1}^k s_j^2}. \end{aligned}$$

In the last step, we solve for  $\eta = \log R_0$  and thus find

$$\hat{R}_{IDEA} = \exp \left( \frac{\sum_{j=1}^k s_j^2 \sum_{j=1}^k \frac{1}{s_j} \log \tilde{I}(s_j) - \sum_{j=1}^k s_j \sum_{j=1}^k \log \tilde{I}(s_j)}{k \sum_{j=1}^k s_j^2 - (\sum_{j=1}^k s_j)^2} \right).$$

## Posterior distributions

$$\begin{aligned} L(\tau, m | \theta, \tau_1^I) &= \left\{ \prod_{i=2}^{m_k} \frac{\beta S(\tau_i^E)}{N} (I(\tau_i^E) + A(\tau_i^E)) \right\} \left\{ \prod_{i=2}^{m_k} \sigma E(\tau_i^A) \right\} \left\{ \prod_{i=2}^{m_k} \rho A(\tau_i^I) \right\} \left\{ \prod_{i=1}^{m_{k-1}} \gamma I(\tau_i^R) \right\} \\ &\quad \times \exp \left\{ - \int_{\tau_1^I}^{t_k} [\beta S(t) (I(t) + A(t)) / N + \sigma E(t) + \rho A(t) + \gamma I(t)] dt \right\}. \end{aligned}$$

First, we calculate the posterior distributions of each of the elements of  $\theta$ . For ease of exposition, in each calculation we drop the subscript on the scale parameter  $k$  in the priors.

$$\begin{aligned} \pi(\beta | \sigma, \rho, \gamma, \tau_1^I, \tau) &\propto L(\tau, m | \theta, \tau_1^I) \pi(\beta) \\ &\propto \left\{ \prod_{i=2}^{m_k} \frac{\beta S(\tau_i^E)}{N} (I(\tau_i^E) + A(\tau_i^E)) \right\} \exp \left\{ - \int_{\tau_1^I}^{t_k} \beta S(t) (I(t) + A(t)) / N dt \right\} \beta^{\alpha-1} \exp(-k\beta) \\ &\propto \beta^{(\alpha+m_k)-1} \exp \left\{ -\beta \left( k + \int_{\tau_1^I}^{t_k} S(t) (I(t) + A(t)) / N dt \right) \right\}. \end{aligned}$$

Hence the posterior distribution for  $\beta$  is gamma with shape parameter  $\alpha + m_k$  and scale parameter  $k + \int_{\tau_1^I}^{t_k} S(t) (I(t) + A(t)) / N dt$ .

$$\begin{aligned}\pi(\sigma|\beta, \rho, \gamma, \tau_1^I, \tau) &\propto L(\tau, m|\theta, \tau_1^I)\pi(\sigma) \\ &\propto \left\{ \prod_{i=2}^{m_k} \sigma E(\tau_i^A) \right\} \exp \left\{ - \int_{\tau_1^I}^{t_k} \sigma E(t) dt \right\} \sigma^{\alpha-1} \exp(-k\sigma) \\ &\propto \sigma^{(m_k+\alpha)-1} \exp \left\{ -\sigma \left( k + \int_{\tau_1^I}^{t_k} E(t) dt \right) \right\}\end{aligned}$$

Hence the posterior distribution for  $\sigma$  is gamma with shape parameter  $\alpha + m_k$  and scale parameter  $k + \int_{\tau_1^I}^{t_k} E(t) dt$ .

$$\begin{aligned}\pi(\rho|\beta, \sigma, \gamma, \tau_1^I, \tau) &\propto L(\tau, m|\theta, \tau_1^I)\pi(\rho) \\ &\propto \left\{ \prod_{i=2}^{m_k} \rho A(\tau_i^I) \right\} \exp \left\{ - \int_{\tau_1^I}^{t_k} \rho A(t) dt \right\} \rho^{\alpha-1} \exp(-k\rho) \\ &= \rho^{(\alpha+m_k)-1} \exp \left\{ -\rho \left( k + \int_{\tau_1^I}^{t_k} A(t) dt \right) \right\}\end{aligned}$$

Hence the posterior distribution for  $\sigma$  is gamma with shape parameter  $\alpha + m_k$  and scale parameter  $k + \int_{\tau_1^I}^{t_k} A(t) dt$ .

$$\begin{aligned}\pi(\gamma|\beta, \rho, \gamma, \tau_1^I, \tau) &\propto L(\tau, m|\theta, \tau_1^I)\pi(\gamma) \\ &\propto \left\{ \prod_{i=1}^{m_{k-1}} \gamma I(\tau_i^R) \right\} \exp \left\{ - \int_{\tau_1^I}^{t_k} \gamma I(t) dt \right\} \gamma^{\alpha-1} \exp(-k\gamma) \\ &\propto \gamma^{(\alpha+m_{k-1})-1} \exp \left\{ -\gamma \left( k + \int_{\tau_1^I}^{t_k} I(t) dt \right) \right\}\end{aligned}$$

Hence the posterior distribution for  $\gamma$  is gamma with shape parameter  $\alpha + m_k$  and scale parameter  $k + \int_{\tau_1^I}^{t_k} I(t) dt$ .

Lastly, we calculate the posterior distribution of  $-\tau_1^I$ , with a prior distribution of exponential, rate one.

$$\begin{aligned}\pi(-\tau_1^I|\theta, \tau) &\propto L(\tau, m|\theta, \tau_1^I)\pi(-\tau_1^I) \\ &\propto \exp \left( - \int_{\tau_1^I}^{\tau_2^I} \frac{\beta}{N} S(t)(I(t) + A(t)) + \sigma E(t) + \rho A(t) + \gamma I(t) dt \right) \exp(\tau_1^I).\end{aligned}$$

For  $\tau_1^I \leq t < \tau_2^I$ , we have that  $S(t) = N$ ,  $I(t) = 1$ ,  $E(t), A(t) = 0$ , and hence

$$\int_{\tau_1^I}^{\tau_2^I} \frac{\beta}{N} S(t)(I(t) + A(t)) + \sigma E(t) + \rho A(t) + \gamma I(t) dt = (\beta + \gamma)(\tau_2^I - \tau_1^I),$$

from which it follows that

$$\begin{aligned}\pi(-\tau_1^I|\beta, \sigma, \rho, \gamma, \tau) &\propto \exp \left( -(\beta + \gamma)(\tau_2^I - \tau_1^I) + \tau_1^I \right) \\ &\propto \exp \left( (\beta + \gamma + 1)\tau_1^I \right),\end{aligned}$$

and hence the posterior of  $-\tau_1^I$  is exponential with rate  $\beta + \gamma + 1$ . Note that this formula is the same for all models.

## Symmetric Proposal

We need to show that  $g(\tau|\tau_l)/g(\tau_l|\tau) = 1$ . To do this, we use the fact that  $g(\tau|\tau_l)$  does not depend on  $\tau_l$ . Moreover,  $g(\tau)$  is a product of uniform distributions, so  $g(\tau)$  also does not depend on  $\tau$ . Therefore  $g(\tau|\tau_l) = c$  for some constant  $c$ , and hence  $g(\tau|\tau_l) = g(\tau_l|\tau) = 1$ .

## Sensitivity to Prior

As mentioned previously, the joint prior distribution of the unknown rate parameters  $\theta$  is made up of independent gamma distributions given by  $\Gamma(\alpha, k)$  with mean  $k/\alpha$ . In the main text, we assume that  $\alpha$  is the same for the parameters  $\beta, \sigma, \rho, \gamma$ , while  $k$  varies and if appropriate will be denoted by  $k_\beta, k_\sigma, k_\rho, k_\gamma$ . In the simulations we took these to be  $\alpha = 1$  and  $k_\beta = k_\sigma = 3, k_\rho = 2, k_\gamma = 5$ . The prior distribution on  $-\tau_1^f$  is exponential with rate one, and this is independent from the  $\theta$  vector. In Figure 8, we compare the results in the main text with results repeating the method with a different prior distribution for the SIR/SEIR/SEAIR data assuming SIR/SEIR/SEAIR models respectively. The modified prior for the comparison is  $k_\beta = 9/4, k_\gamma = 3$ . These were chosen as alternative reasonable parameters for the influenza. The plots show that there was very little change between the two versions.

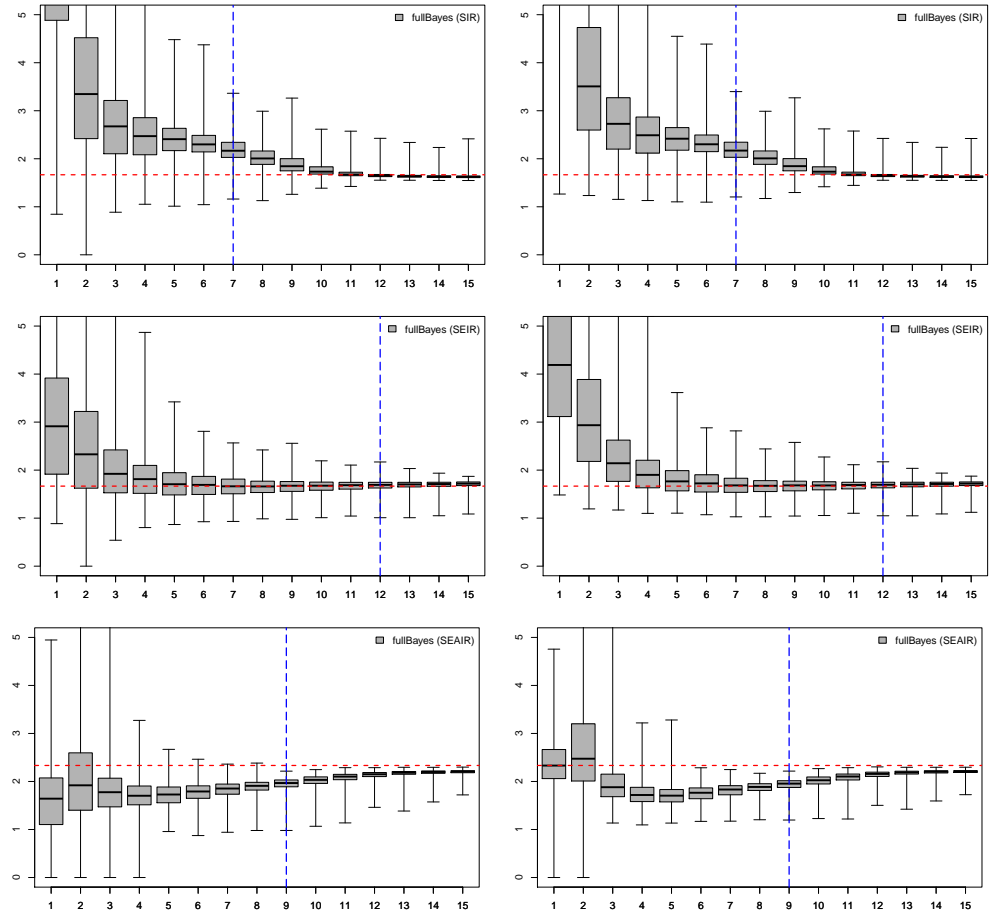

**Fig 8.** Comparison of the fullBayes method for SIR, SEIR, and SEAIR data with two different prior distributions: same as main text is on the right and the modified version is on the left. The inflection point for the epidemic is marked in blue, and the true  $R_0$  for the data is marked as a horizontal red line.
